# Supplementary material for: The Influence of Acupuncture Parameters on Efficacy and the Possible Use of Acupuncture in Combination with or as a Substitute for Drug Therapy in Patients with Ulcerative Colitis
Source: Evid Based Complement Alternat Med. 2022 Mar 22;2022:8362892. doi: 10.1155/2022/8362892 (PMC8964160; doi:10.1155/2022/8362892)
Supplement: Supplementary Materials — Supplementary S1: search strategy for different databases. Supplementary S2: funnel plot and Egger's test graphs of outcomes. Supplementary S3: GRADE Quality evaluation form. Supplementary S4: PRISMA_2020_checklist. [file 8362892.f1.zip]

Archive with 4 entries (4 files):
- 8362892.f1/SUPPLE_1.doc
- 8362892.f1/SUPPLE_2 figures.DOC
- 8362892.f1/SUPPLE_3 (2).DOC
- 8362892.f1/SUPPLE_4.DOC
